# Supplementary material
Source: PubMed Central journal article supplement (PMC6376452)

Fig. 10b

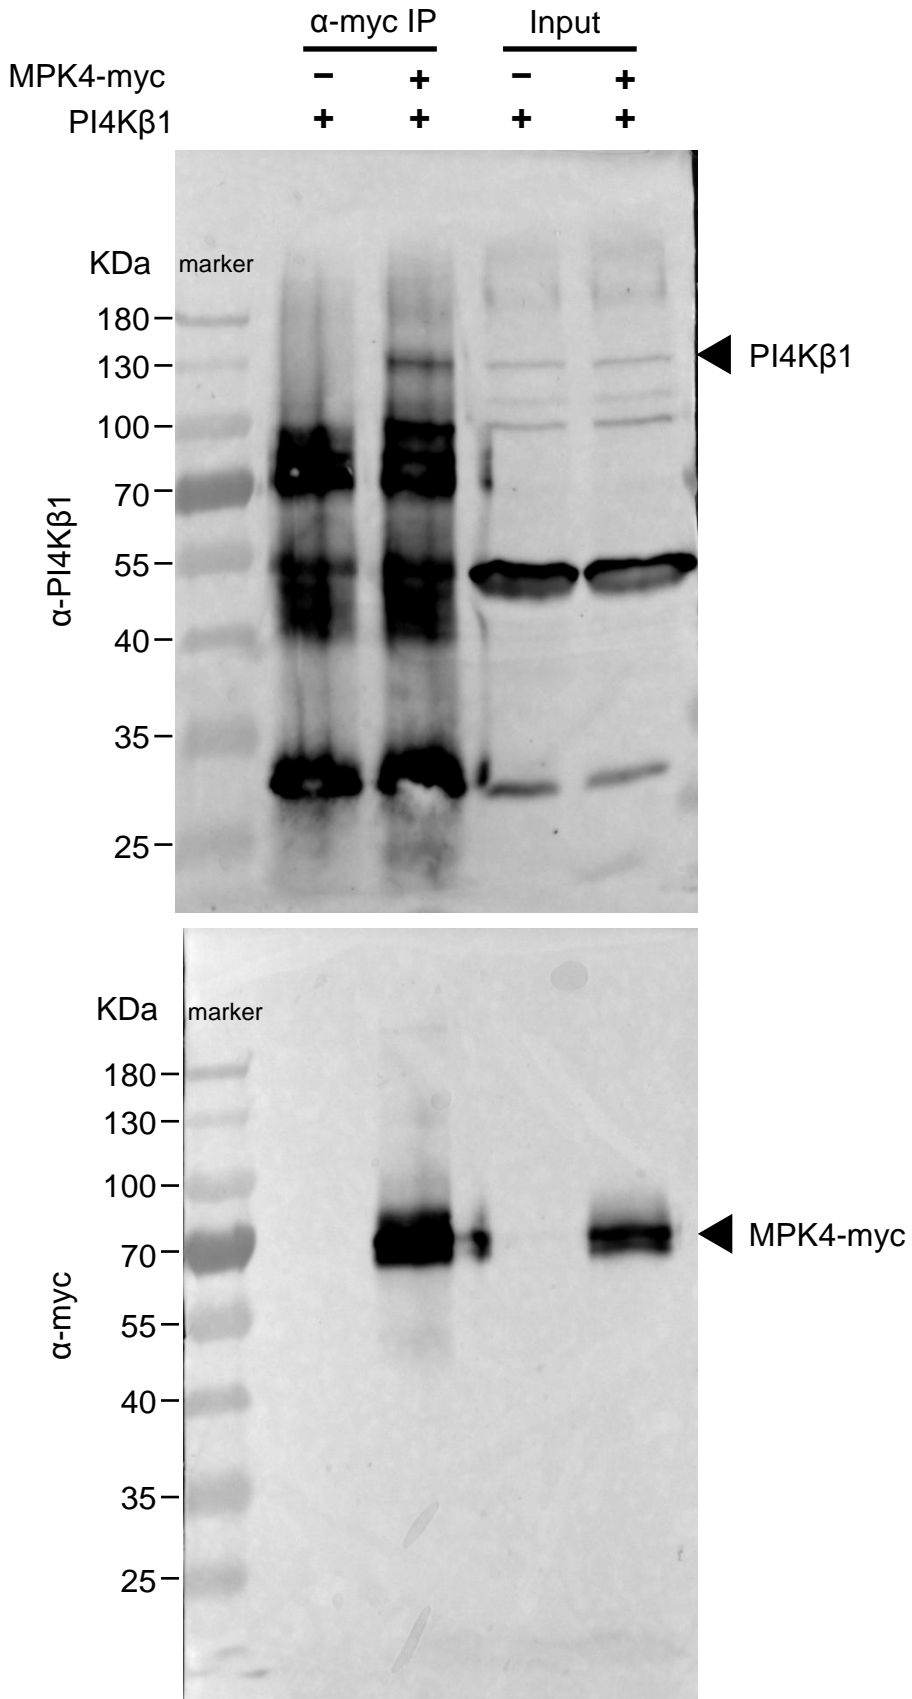

Supplement: EMBJ-38-e100303-s008.pdf [file EMBJ-38-e100303-s008.pdf]
